# Supplementary material for: Proteomics-Based Evidence for a Pro-Oncogenic Role of ESRP1 in Human Colorectal Cancer Cells
Source: MDPI journal article supplement (doi:10.3390/ijms21020575), 2020-01-16
Supplement: s1 [file s1]

Supplementary Table S2: Antibodies used

| Antibodies | Company           |
|------------|-------------------|
| ESRP1      | Sigma             |
| ESRP1      | Abcam             |
| SF3A1      | Thermo Scientific |
| CCAR2      | Sigma             |
| HSP90      | Sigma             |
| FBF1       | ProteinTech       |
| TPI1       | ProteinTech       |
