# Supplementary material for: Proteomics-Based Evidence for a Pro-Oncogenic Role of ESRP1 in Human Colorectal Cancer Cells
Source: MDPI journal article supplement (doi:10.3390/ijms21020575), 2020-01-16
Supplement: s1 [file s1]

Supplementary Table S1: Primers used for Real-time PCR

| qRT-PCR Primers name | 5'-3' sequence              | UPL probe |
|----------------------|-----------------------------|-----------|
| SF3A1_Left           | tcatgccagaggaggagttc        | #47       |
| SF3A1_Right          | ttgggcacctggactttg          |           |
| FBF1_Left            | gaggcacggctgaatgag          | #15       |
| FBF1_Right           | actccgccttggactgct          |           |
| TPI1_Left            | gttgggggaaactggaagat        | #38       |
| TPI1_Right           | tagggggagcacaaccac          |           |
| CCAR2 left           | tcatggacggttggatccag        | #22       |
| CCAR2 right          | atgccttggcttcttagcac        |           |
| ESRP1 left           | tgatcttcgaaaagaattcaagaaa   | #37       |
| ESRP1 right          | cgagagactgaactactcttctcaaaa |           |
